# Supplementary material for: A Mixture of Dietary Plant Sterols at Nutritional Relevant Serum Concentration Inhibits Extrinsic Pathway of Eryptosis Induced by Cigarette Smoke Extract
Source: MDPI journal article supplement (doi:10.3390/ijms24021264), 2023-01-09
Supplement: s1 [file s1]

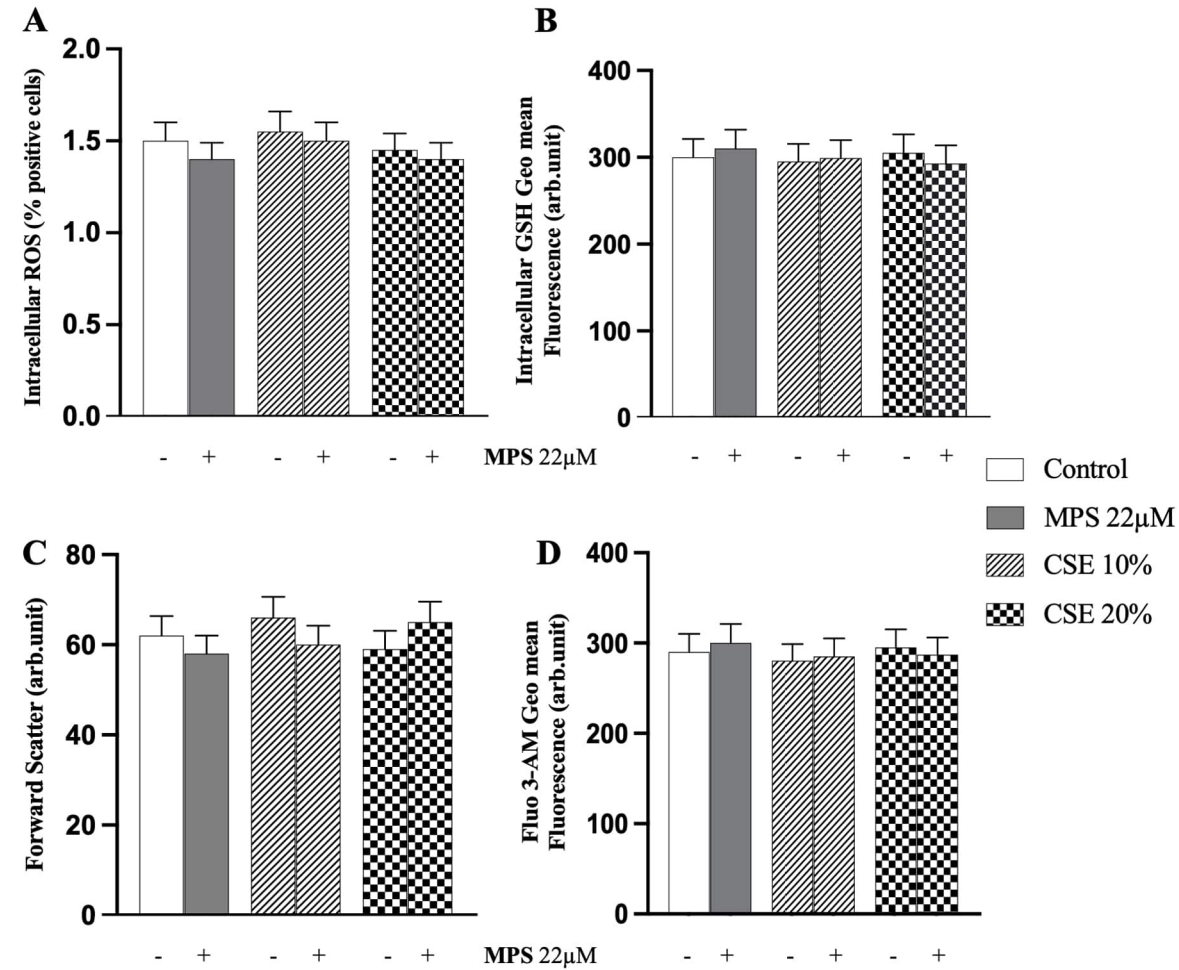

**Figure S1.** CSE does not induce variations of ROS, GSH,  $\text{Ca}^{2+}$  and FSC. (A) Intracellular ROS, (B) intracellular GSH, (C) variation of cell volume measured by FSC and (D) intracellular  $\text{Ca}^{2+}$  levels in 10% or 20% CSE-treated RBCs incubated for 4 h in the absence or in co-treatment with MPS 22  $\mu\text{M}$  measured by flow cytometry. Protocol of measurement to chapters 4.4, 4.5, 4.6 and 4.7. RBCs incubated with Ringer solution were used as control. Values are means  $\pm$  SD of (n=6) experiments carried out in triplicate.
